# Supplementary material
Source: HighWire-hosted journal article supplement (https://jnm.snmjournals.org/highwire/filestream/93971/field_highwire_adjunct_files/0/jnm058339_suppl_fig.pdf)
Supplement: jnm058339_suppl_fig.pdf [file jnm058339_suppl_fig.pdf]

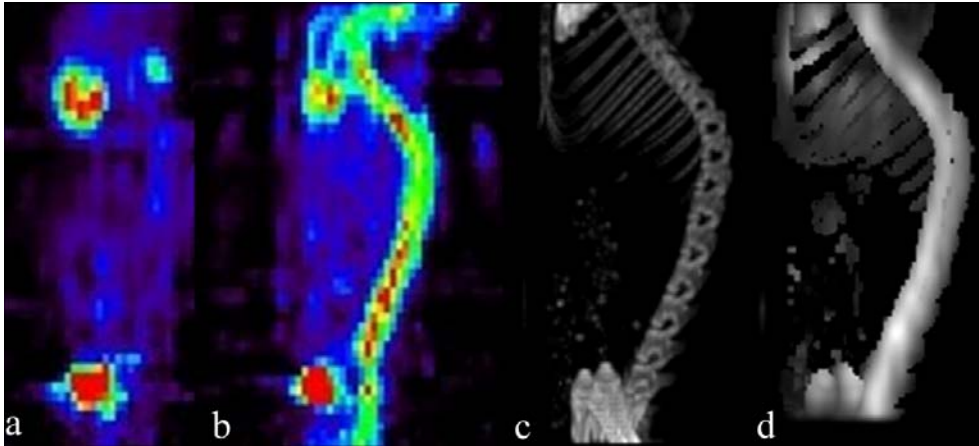

**SUPPLEMENTAL FIGURE 1.** Sagittal views of an imaged mouse: a)  $^{18}\text{F}$  FDG microPET; b) combined  $^{18}\text{F}/^{18}\text{F}$  FDG microPET; c) bone window images from microCT used as a mask for the display of skeletal  $^{18}\text{F}/^{18}\text{F}$  FDG uptake on microPET; d) Skeletal distribution of the  $^{18}\text{F}/^{18}\text{F}$  FDG after subtraction of uptake outside the osseous structures using the micro-CT bone mask.
